# Supplementary material for: Impact of the coordination environment on the magnetic properties of single-molecule magnets based on homo- and hetero-dinuclear terbium(iii) heteroleptic tris(crownphthalocyaninate)
Source: Royal Society of Chemistry journal article supplement (doi:10.1039/c6dt00777e), 2016-01-01
Supplement: c6dt00777e1.pdf [file c6dt00777e1.pdf]

## Supporting Information

# Impact of Coordination Environment on Magnetic Properties of Single-Molecule Magnets Based on Homo- and Hetero-Dinuclear Terbium(III) Heteroleptic Tris(Crownphthalocyaninate)

Rebecca J. Holmberg,<sup>a</sup> Marina A. Polovkova,<sup>b</sup> Alexander G. Martynov<sup>b</sup>, Yulia G. Gorbunova,<sup>\*b,c</sup>  
Muralee Murugesu<sup>\*,a</sup>

<sup>a</sup> Department of Chemistry and Biomolecular Sciences, and Centre for Catalysis Research and Innovation, University of Ottawa, Ottawa, Ontario, K1N 6N5, Canada

<sup>b</sup> A. N. Frumkin Institute of Physical Chemistry and Electrochemistry RAS, Leninsky Prosp. 31, Moscow 119071, Russia

<sup>c</sup> N. S. Kurnakov Institute of General and Inorganic Chemistry RAS, Leninsky Prosp. 31, Moscow 119991, Russia

---

|                                                                                                                                                                                                                                                                                                                                                                                                                                                |    |
|------------------------------------------------------------------------------------------------------------------------------------------------------------------------------------------------------------------------------------------------------------------------------------------------------------------------------------------------------------------------------------------------------------------------------------------------|----|
| <b>Supplementary Figures and Data</b>                                                                                                                                                                                                                                                                                                                                                                                                          | 3  |
| <b>Fig. S1</b> UV-Vis absorption spectrum of [Tb*,Tb] ( <b>1</b> ) in chloroform.                                                                                                                                                                                                                                                                                                                                                              | 3  |
| <b>Fig. S2</b> UV-Vis absorption spectrum of [Tb*,Y] ( <b>2</b> ) in chloroform.                                                                                                                                                                                                                                                                                                                                                               | 3  |
| <b>Fig. S3</b> UV-Vis absorption spectrum of [Y*,Tb] ( <b>3</b> ) in chloroform.                                                                                                                                                                                                                                                                                                                                                               | 4  |
| <b>Fig. S4</b> HR-ESI MS of [Tb*,Tb] ( <b>1</b> ).                                                                                                                                                                                                                                                                                                                                                                                             | 5  |
| <b>Fig. S5</b> HR-ESI MS of [Tb*,Y] ( <b>2</b> ).                                                                                                                                                                                                                                                                                                                                                                                              | 6  |
| <b>Fig. S6</b> HR-ESI MS [Y*,Tb] ( <b>3</b> ).                                                                                                                                                                                                                                                                                                                                                                                                 | 7  |
| <b>Fig. S7</b> MALDI-TOF spectrum of [Tb*,Tb] ( <b>1</b> ).                                                                                                                                                                                                                                                                                                                                                                                    | 8  |
| <b>Fig. S8</b> MALDI-TOF spectrum of [Tb*,Y] ( <b>2</b> ).                                                                                                                                                                                                                                                                                                                                                                                     | 9  |
| <b>Fig. S9</b> MALDI-TOF spectrum of [Y*,Tb] ( <b>3</b> ).                                                                                                                                                                                                                                                                                                                                                                                     | 10 |
| <b>Fig. S10</b> Field dependence of the magnetization (left) and $M$ vs. $HT^{-1}$ plot (right) of <b>1</b> at indicated temperatures.                                                                                                                                                                                                                                                                                                         | 11 |
| <b>Fig. S11</b> Field dependence of the magnetization (left) and $M$ vs. $HT^{-1}$ plot (right) of <b>2</b> at indicated temperatures.                                                                                                                                                                                                                                                                                                         | 11 |
| <b>Fig. S12</b> Field dependence of the magnetization (left) and $M$ vs. $HT^{-1}$ plot (right) of <b>3</b> at indicated temperatures.                                                                                                                                                                                                                                                                                                         | 12 |
| <b>Fig. S13</b> Data obtained from generalized Debye fits of $\chi'$ and $\chi''$ frequency dependent ac data <b>1</b> . Temperature dependence of $\chi_0$ and $\chi_{inf}$ (top left), $\chi_0-\chi_{inf}$ (top right), and $\alpha$ (bottom left). Relaxation times of the magnetization $\ln(\tau)$ vs. $T^{-1}$ for <b>1</b> (Arrhenius plot using $\chi'$ (red) and $\chi''$ (blue) ac data) under 0 Oe applied dc field (bottom right). | 13 |
| <b>Table S1</b> Fitting values from Cole-Cole plot for <b>1</b> under 0 Oe applied dc field.                                                                                                                                                                                                                                                                                                                                                   | 14 |

**Fig. S14** |Data obtained from generalized Debye fits of  $\chi'$  and  $\chi''$  frequency dependent ac data under 1500 Oe applied dc field for **2**. Temperature dependence of  $\chi_0$  and  $\chi_{inf}$  (top left),  $\chi_0-\chi_{inf}$  (top right), and  $\alpha$  (bottom left). Relaxation times of the magnetization  $\ln(\tau)$  vs.  $T^{-1}$  for **2** (Arrhenius plot using  $\chi'$  (red) and  $\chi''$  (blue) ac data) under 1500 Oe applied dc field (bottom right). The solid red line corresponds to the fit of the data. 15

**Fig. S15** Cole-Cole plot for ac susceptibility data of **2** under 1500 Oe applied dc field. Solid lines are the best fit to the generalized Debye model. 16

**Table S2** Fitting values from Cole-Cole plot for **2** under 1500 Oe applied dc field. 18

**Fig. S16** |Data obtained from generalized Debye fits of  $\chi'$  and  $\chi''$  frequency dependent ac data under 1500 Oe applied dc field for **3**. Temperature dependence of  $\chi_0$  and  $\chi_{inf}$  (top left),  $\chi_0-\chi_{inf}$  (top right), and  $\alpha$  (bottom left). Relaxation times of the magnetization  $\ln(\tau)$  vs.  $T^{-1}$  for **3** (Arrhenius plot using  $\chi'$  (red) and  $\chi''$  (blue) ac data) under 1500 Oe applied dc field (bottom right). The solid red line corresponds to the fit of the data. 18

**Fig. S17** Cole-Cole plot for ac susceptibility data of **3** under 1500 Oe applied dc field. Solid lines are the best fit to the generalized Debye model. 19

**Table S3** Fitting values from Cole-Cole plot for **3** under 1500 Oe applied dc field. 20

## Supplementary Figures and Data

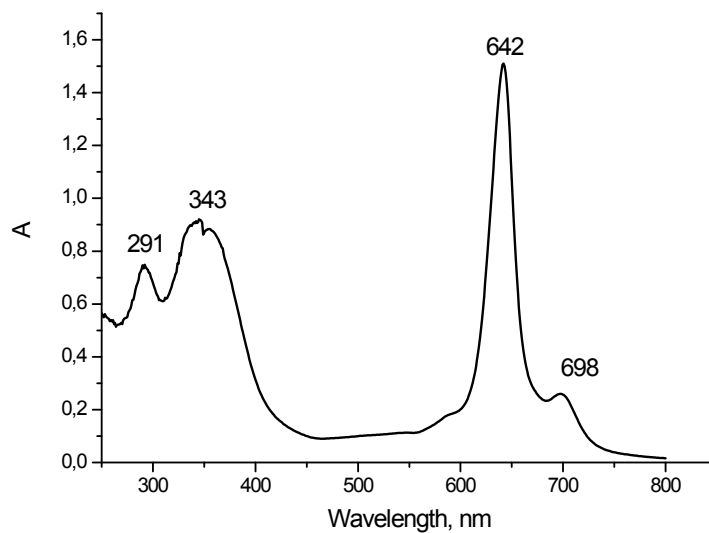

**Fig. S1** UV-Vis absorption spectrum of [Tb\*,Tb] (1) in chloroform.

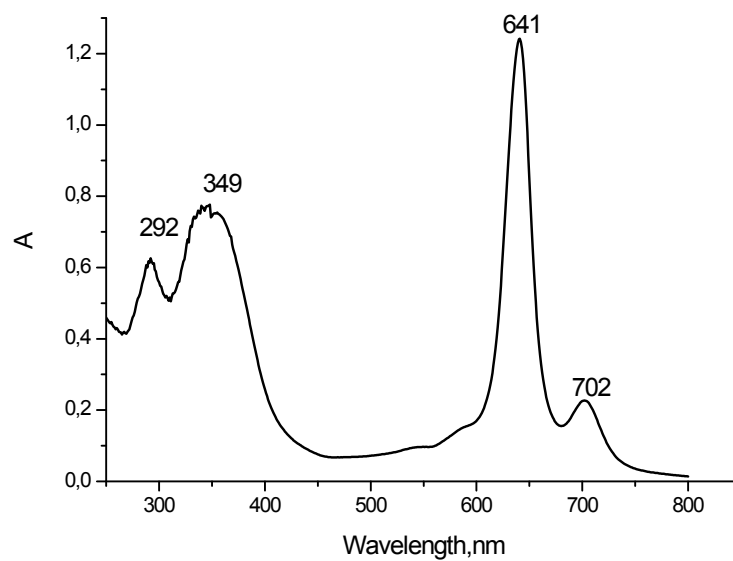

**Fig. S2** UV-Vis absorption spectrum of [Tb\*,Y] (2) in chloroform.

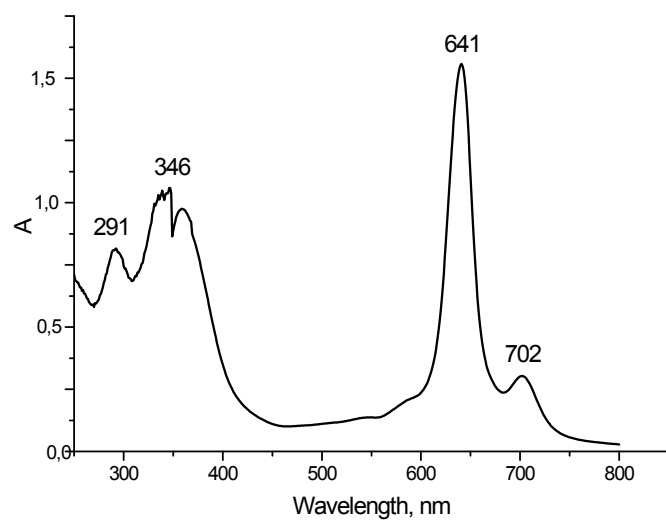

**Fig. S3** UV-Vis absorption spectrum of [Y\*,Tb] (3) in chloroform.

## Complex 1

HR-ESI: found 1148.333 –  $[M+3Na]^{3+}$ , calculated for  $[C_{160}H_{160}N_{24}O_{40}Tb_2+3Na]^{3+}$  - 1148.315

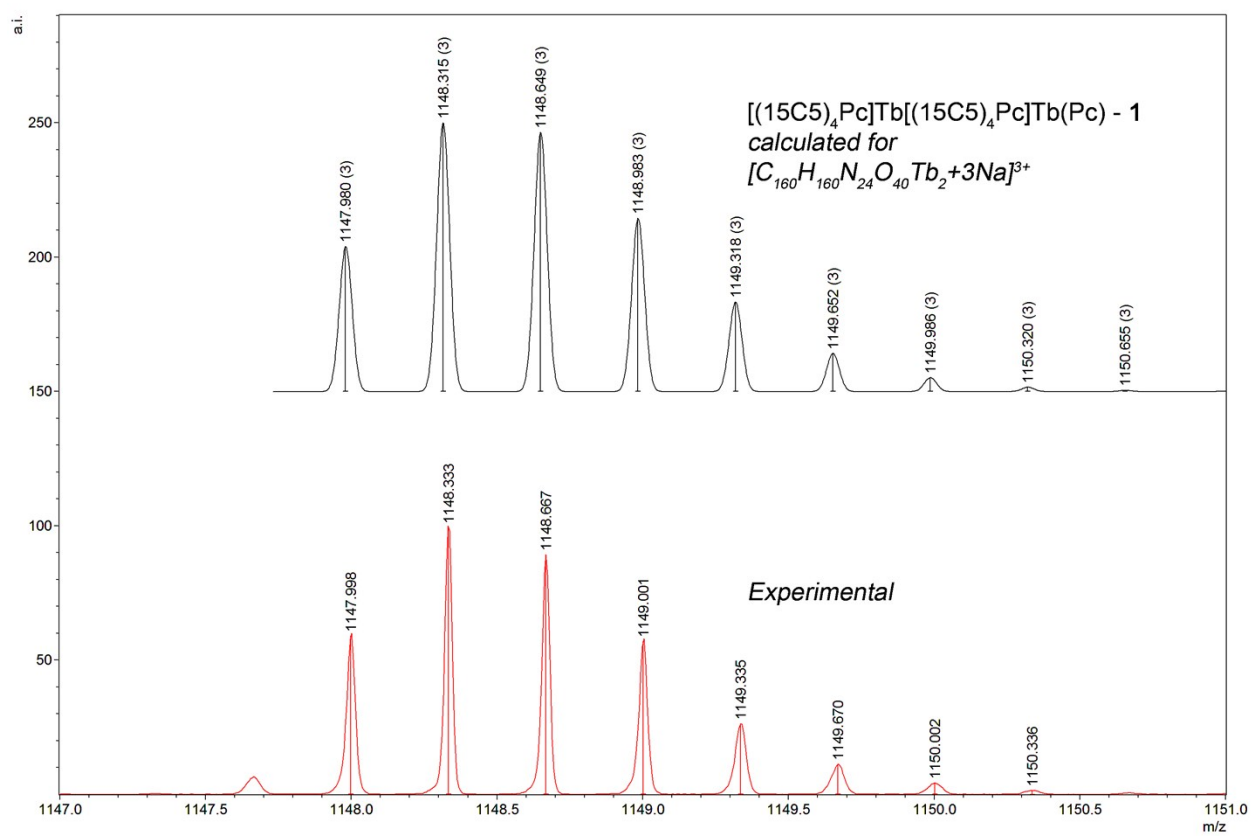

Fig. S4 HR-ESI MS of  $[Tb^*,Tb]$  (1).

## Complex 2

HR-ESI: found 1124.981 –  $[M+3Na]^{3+}$ , calculated for  $[C_{160}H_{160}N_{24}O_{40}TbY+3Na]^{3+}$  - 1124.975

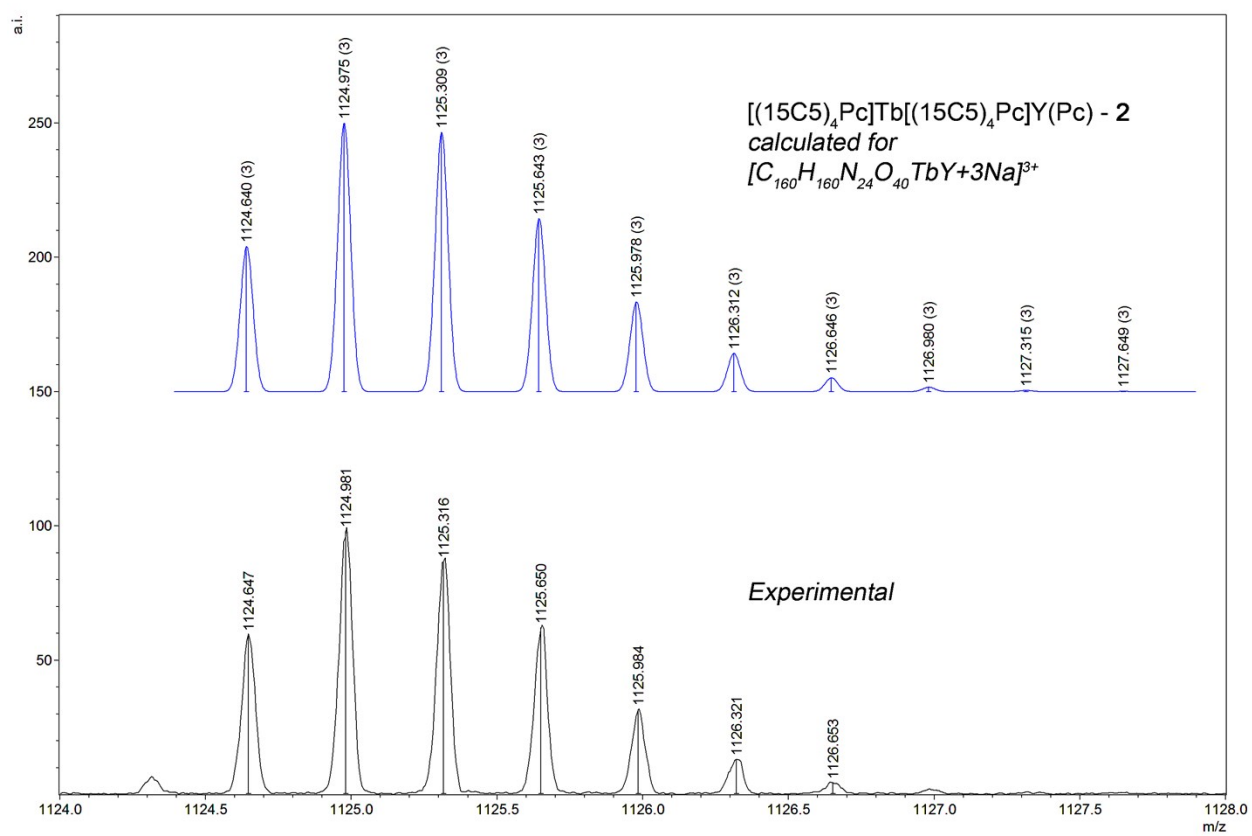

Fig. S5 HR-ESI MS of  $[Tb^*,Y] (2)$ .

### Complex 3

HR-ESI: found 1124.974 –  $[M+3Na]^{3+}$ , calculated for  $[C_{160}H_{160}N_{24}O_{40}TbY+3Na]^{3+}$  - 1124.975

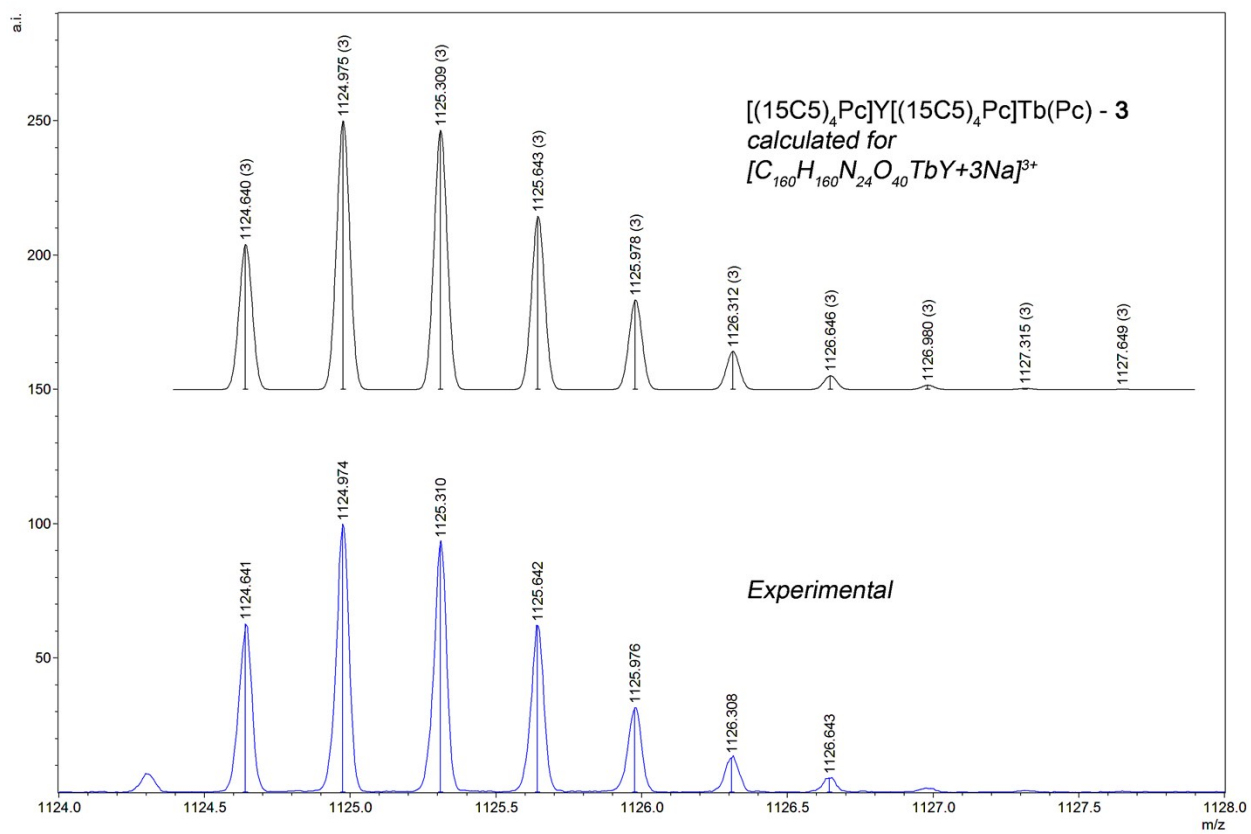

Fig. S6 HR-ESI MS of  $[Y^*, Tb] (3)$ .

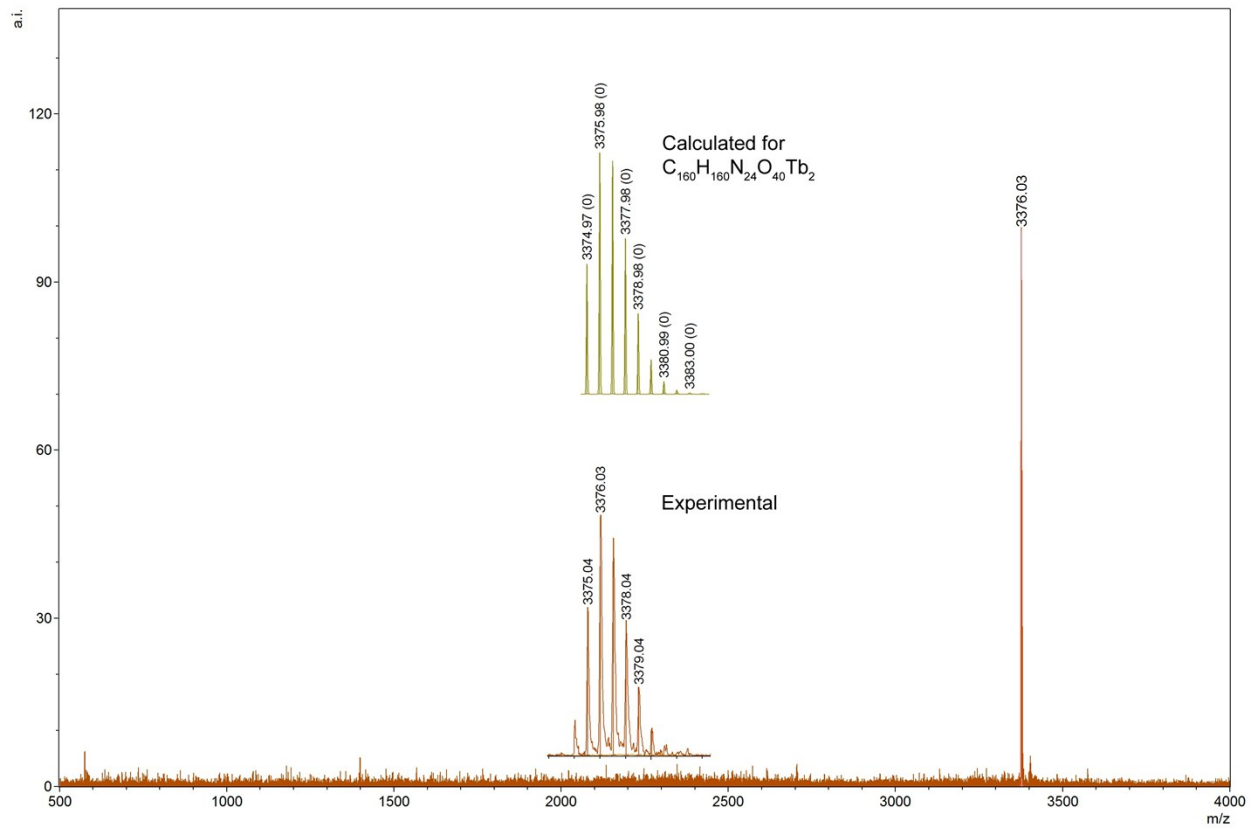

**Fig. S7** MALDI-TOF spectrum of [Tb\*,Tb] (1).



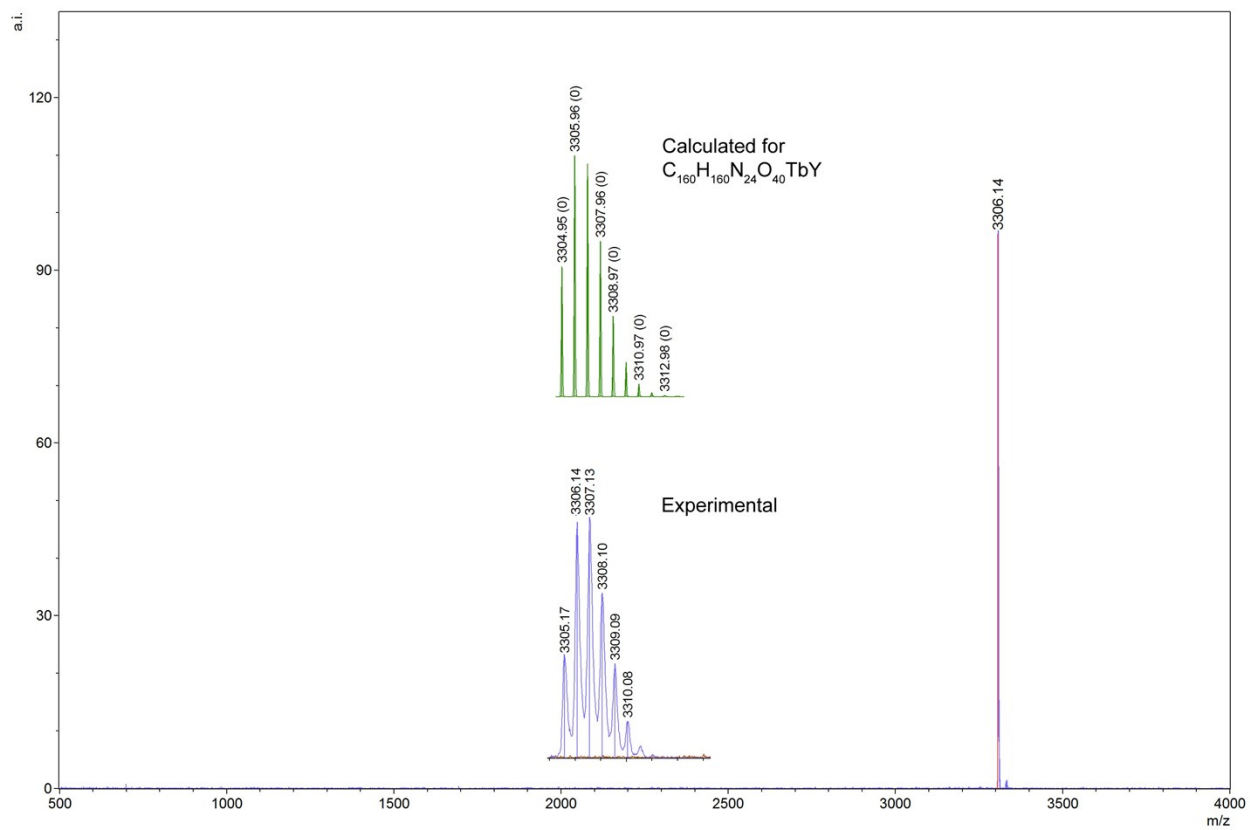

**Fig. S8** MALDI-TOF spectrum of  $[Tb^*,Y]$  (**2**).

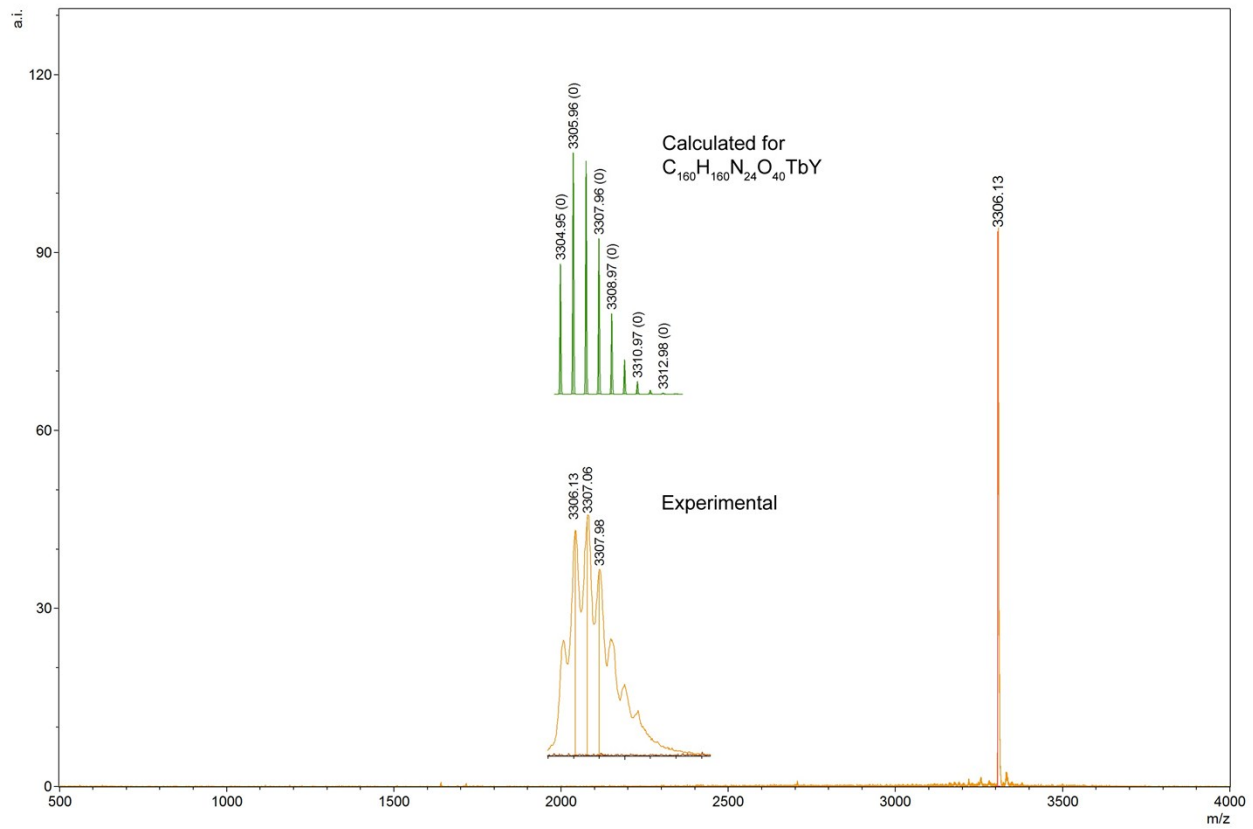

**Fig. S9** MALDI-TOF mass spectrum of [Y\*,Tb] (3).

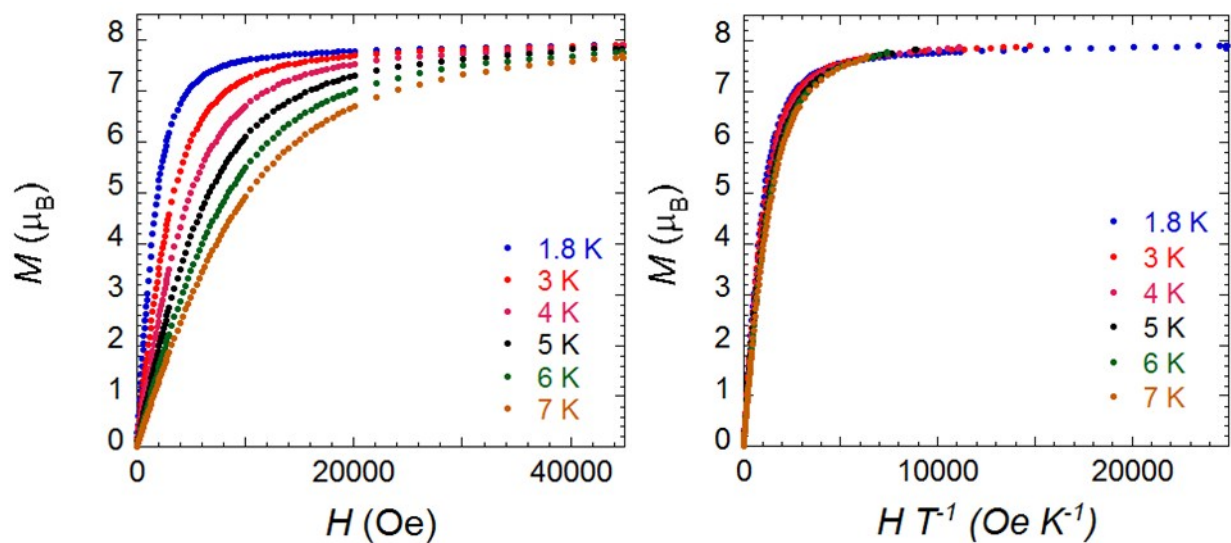

**Fig. S10** Field dependence of the magnetization (left) and  $M$  vs.  $HT^{-1}$  plot (right) of **1** at indicated temperatures.

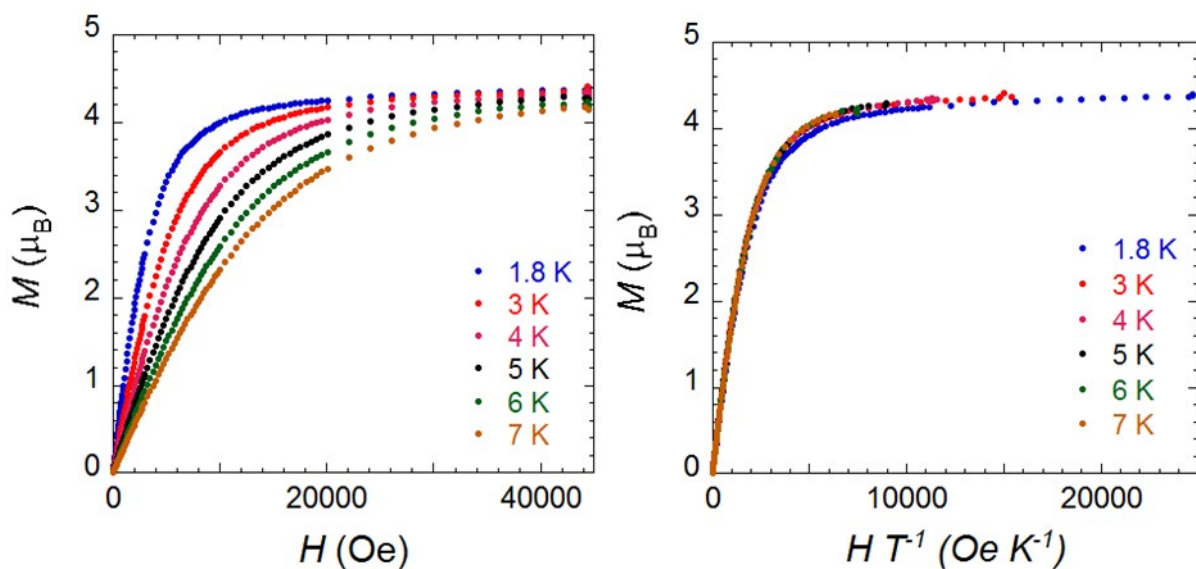

**Fig. S11** Field dependence of the magnetization (left) and  $M$  vs.  $HT^{-1}$  plot (right) of **2** at indicated temperatures.

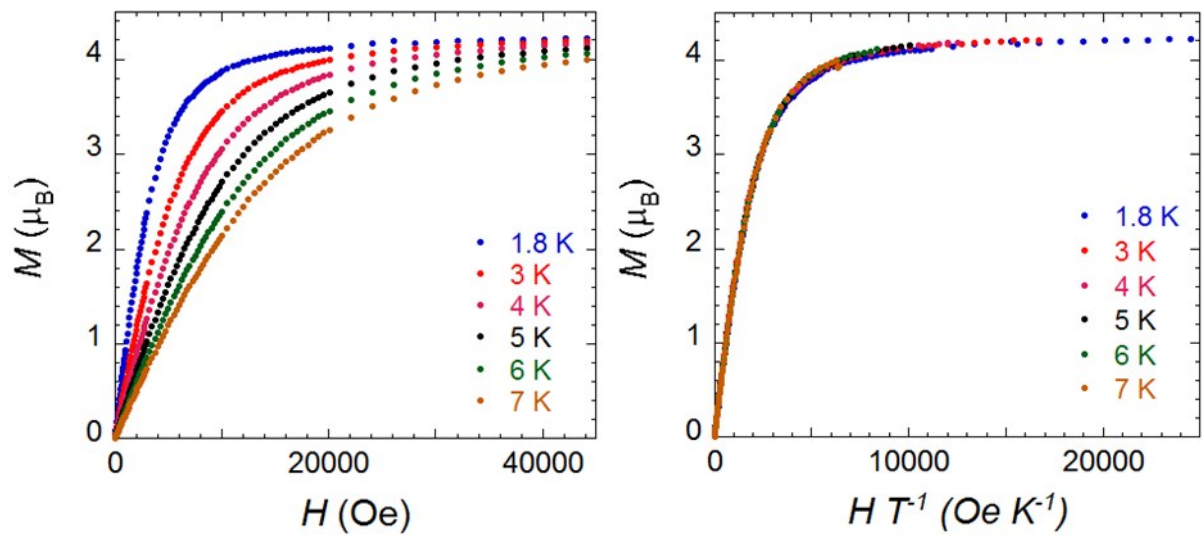

**Fig. S12** Field dependence of the magnetization (left) and  $M$  vs.  $HT^{-1}$  plot (right) of **3** at indicated temperatures.

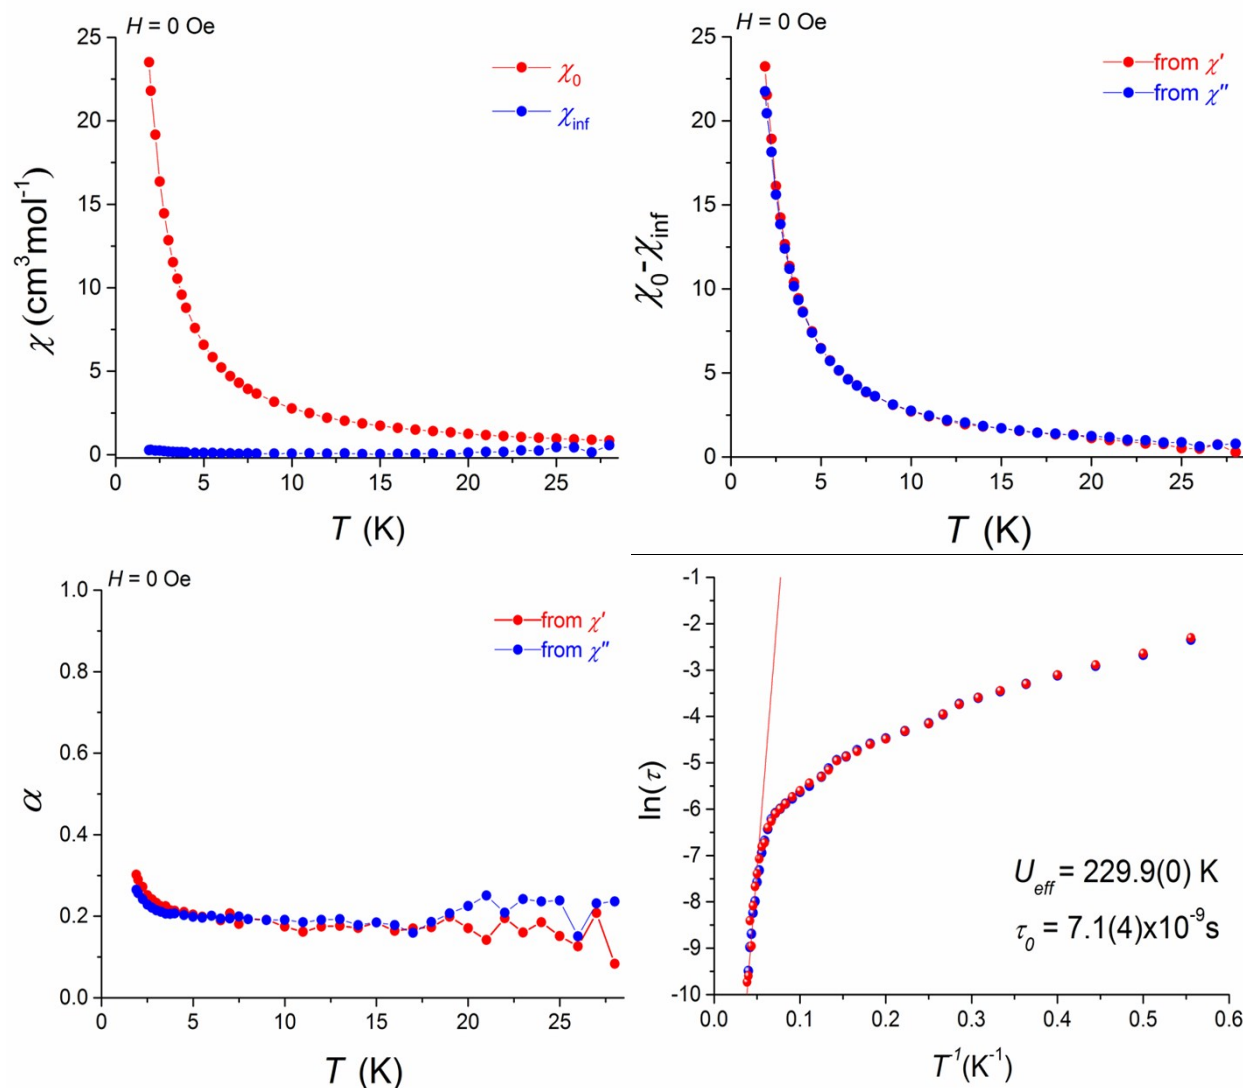

**Fig. S13** Data obtained from generalized Debye fits of  $\chi'$  and  $\chi''$  frequency dependent ac data **1**. Temperature dependence of  $\chi_0$  and  $\chi_{\text{inf}}$  (top left),  $\chi_0 - \chi_{\text{inf}}$  (top right), and  $\alpha$  (bottom left). Relaxation times of the magnetization  $\ln(\tau)$  vs.  $T^{-1}$  for **1** (Arrhenius plot using  $\chi'$  (red) and  $\chi''$  (blue) ac data) under 0 Oe applied dc field (bottom right). The solid red line corresponds to the fit of the data.

**Table S1.** Fitting values from Cole-Cole plot for **1** under 0 Oe applied dc field.

| <b>T (K)</b> | <b><math>\tau</math> (s)</b> | <b><math>\alpha</math></b> | <b><math>X_S</math></b> | <b><math>X_T</math></b> |
|--------------|------------------------------|----------------------------|-------------------------|-------------------------|
| 24           | 0.00017985                   | 0.38462                    | 0.23544                 | 0.86573                 |
| 23           | 0.00035068                   | 0.23646                    | 0.22963                 | 0.96151                 |
| 22           | 0.00044249                   | 0.27251                    | 0.21626                 | 1.00100                 |
| 21           | 0.00062282                   | 0.26694                    | 0.17962                 | 1.04777                 |
| 20           | 0.00081929                   | 0.25809                    | 0.17979                 | 1.11288                 |
| 19           | 0.00089111                   | 0.26055                    | 0.15262                 | 1.21000                 |
| 18           | 0.00130159                   | 0.22149                    | 0.15656                 | 1.26941                 |
| 17           | 0.00149722                   | 0.21996                    | 0.17093                 | 1.35526                 |
| 16           | 0.00177027                   | 0.21831                    | 0.17046                 | 1.35618                 |
| 15           | 0.00199297                   | 0.21018                    | 0.17326                 | 1.45384                 |
| 14           | 0.00221499                   | 0.21166                    | 0.18911                 | 1.69036                 |
| 13           | 0.0024853                    | 0.23832                    | 0.23447                 | 1.82545                 |
| 12           | 0.002888                     | 0.22425                    | 0.24583                 | 2.00049                 |
| 11           | 0.00350962                   | 0.19601                    | 0.25189                 | 2.27613                 |
| 10           | 0.00396596                   | 0.20678                    | 0.28858                 | 2.52376                 |
| 9            | 0.00450744                   | 0.22423                    | 0.35304                 | 2.86017                 |
| 8            | 0.00547219                   | 0.22416                    | 0.39111                 | 3.29238                 |
| 7.5          | 0.00592504                   | 0.23301                    | 0.43514                 | 3.54052                 |
| 7            | 0.00657247                   | 0.23747                    | 0.47205                 | 3.85004                 |
| 6.5          | 0.00768218                   | 0.23495                    | 0.51735                 | 4.22236                 |
| 6            | 0.00850233                   | 0.24317                    | 0.57813                 | 4.65519                 |
| 5.5          | 0.01007128                   | 0.24464                    | 0.6723                  | 5.21374                 |
| 5            | 0.011773                     | 0.24811                    | 0.75771                 | 5.86022                 |
| 4.5          | 0.01396308                   | 0.26849                    | 0.90901                 | 6.68588                 |
| 4            | 0.01734291                   | 0.26824                    | 1.06888                 | 7.75803                 |
| 3.75         | 0.01997734                   | 0.26593                    | 1.161                   | 8.44211                 |
| 3.5          | 0.02256522                   | 0.28542                    | 1.33596                 | 9.18394                 |
| 3.25         | 0.02598269                   | 0.28728                    | 1.47357                 | 10.05497                |
| 3            | 0.03100923                   | 0.29933                    | 1.70565                 | 11.1297                 |
| 2.75         | 0.03751467                   | 0.3172                     | 2.01524                 | 12.39333                |
| 2.5          | 0.04686485                   | 0.33325                    | 2.3966                  | 13.903                  |
| 2.25         | 0.06263439                   | 0.36597                    | 3.02747                 | 15.9682                 |
| 2            | 0.07999911                   | 0.40328                    | 3.7613                  | 17.76293                |
| 1.9          | 0.09387486                   | 0.42089                    | 4.19594                 | 18.817                  |

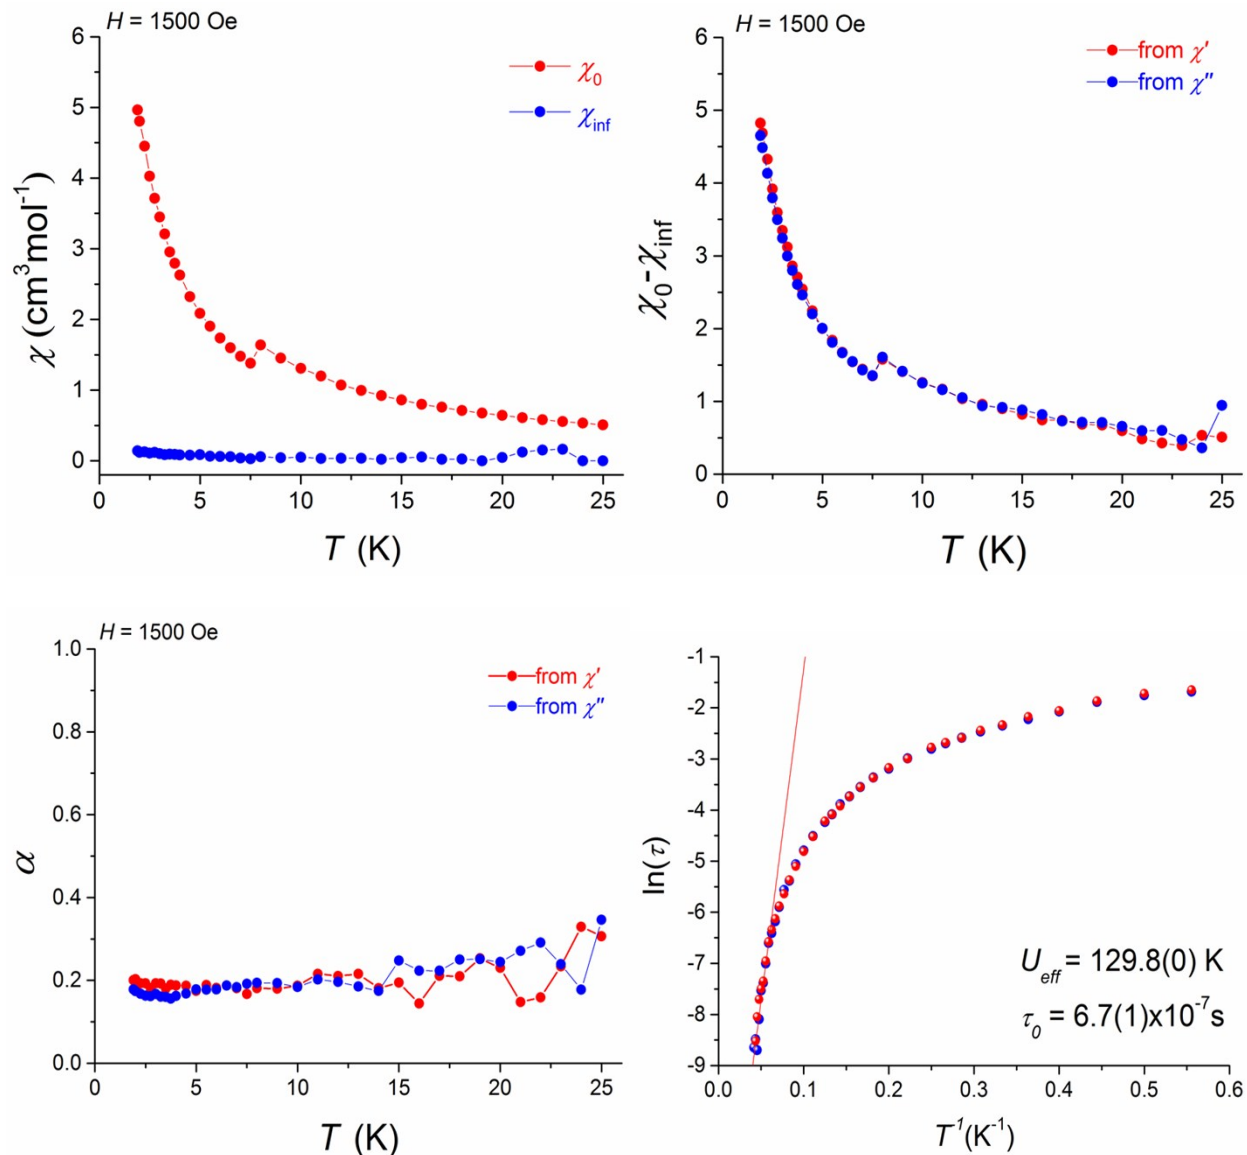

**Fig. S14** | Data obtained from generalized Debye fits of  $\chi'$  and  $\chi''$  frequency dependent ac data under 1500 Oe applied dc field for **2**. Temperature dependence of  $\chi_0$  and  $\chi_{\text{inf}}$  (top left),  $\chi_0 - \chi_{\text{inf}}$  (top right), and  $\alpha$  (bottom left). Relaxation times of the magnetization  $\ln(\tau)$  vs.  $T^{-1}$  for **2** (Arrhenius plot using  $\chi'$  (red) and  $\chi''$  (blue) ac data) under 1500 Oe applied dc field (bottom right). The solid red line corresponds to the fit of the data.

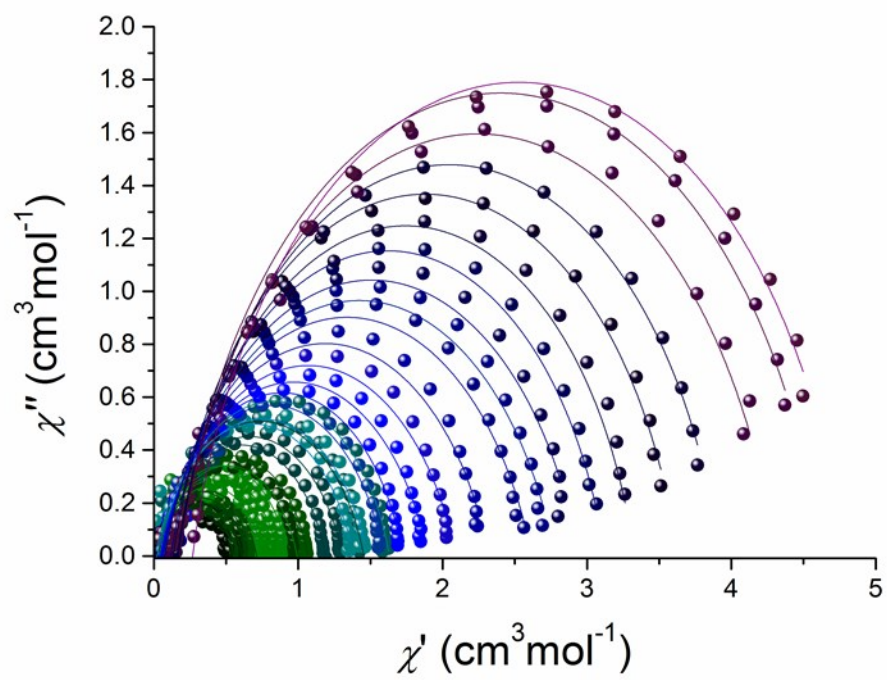

**Fig. S15** Cole-Cole plot for ac susceptibility data of **2** under 1500 Oe applied dc field. Solid lines are the best fit to the generalized Debye model.



**Table S2.** Fitting values from Cole-Cole plot for **2** under 1500 Oe applied dc field.

| <b>T (K)</b> | <b><math>\tau</math> (s)</b> | <b><math>\alpha</math></b> | <b><math>X_S</math></b> | <b><math>X_T</math></b> |
|--------------|------------------------------|----------------------------|-------------------------|-------------------------|
| 23           | 0.00014977                   | 0.15928                    | 0.17738                 | 0.52183                 |
| 22           | 0.00027271                   | 0.30407                    | 0.11102                 | 0.51405                 |
| 21           | 0.00032813                   | 0.26009                    | 0.12069                 | 0.55084                 |
| 20           | 0.00038903                   | 0.28247                    | 0.09301                 | 0.5702                  |
| 19           | 0.00049347                   | 0.21264                    | 0.0645                  | 0.59267                 |
| 18           | 0.00069644                   | 0.27368                    | 0.09816                 | 0.63257                 |
| 17           | 0.00103199                   | 0.26022                    | 0.10392                 | 0.67556                 |
| 16           | 0.00130364                   | 0.26654                    | 0.09402                 | 0.71531                 |
| 15           | 0.00161582                   | 0.26469                    | 0.10605                 | 0.76815                 |
| 14           | 0.00217307                   | 0.22953                    | 0.09874                 | 0.83778                 |
| 13           | 0.00260201                   | 0.27187                    | 0.1387                  | 0.88181                 |
| 12           | 0.00353311                   | 0.24632                    | 0.1371                  | 0.95873                 |
| 11           | 0.00453866                   | 0.25611                    | 0.15077                 | 1.06345                 |
| 10           | 0.00588136                   | 0.27991                    | 0.17285                 | 1.1559                  |
| 9            | 0.00794643                   | 0.26993                    | 0.18341                 | 1.29193                 |
| 8            | 0.01124812                   | 0.23777                    | 0.19949                 | 1.47155                 |
| 7.5          | 0.0126867                    | 0.24631                    | 0.15265                 | 1.2367                  |
| 7            | 0.01442855                   | 0.2712                     | 0.18781                 | 1.31504                 |
| 6.5          | 0.018128                     | 0.23603                    | 0.1985                  | 1.43507                 |
| 6            | 0.02176318                   | 0.23712                    | 0.21648                 | 1.55674                 |
| 5.5          | 0.02485139                   | 0.27177                    | 0.25414                 | 1.68526                 |
| 5            | 0.03009696                   | 0.2755                     | 0.28737                 | 1.85429                 |
| 4.5          | 0.03617997                   | 0.27144                    | 0.31371                 | 2.06206                 |
| 4            | 0.04475436                   | 0.2753                     | 0.35594                 | 2.32135                 |
| 3.75         | 0.04988592                   | 0.26583                    | 0.37075                 | 2.4738                  |
| 3.5          | 0.05609293                   | 0.24743                    | 0.37359                 | 2.64286                 |
| 3.25         | 0.06802268                   | 0.19896                    | 0.37395                 | 2.86753                 |
| 3            | 0.07921552                   | 0.17492                    | 0.40127                 | 3.08494                 |
| 2.75         | 0.09191493                   | 0.1812                     | 0.40775                 | 3.35258                 |
| 2.5          | 0.10455368                   | 0.17506                    | 0.45469                 | 3.6347                  |
| 2.25         | 0.12356619                   | 0.19358                    | 0.5205                  | 3.96503                 |
| 2            | 0.14627561                   | 0.17693                    | 0.5208                  | 4.28468                 |
| 1.9          | 0.15862855                   | 0.17128                    | 0.60458                 | 4.45011                 |

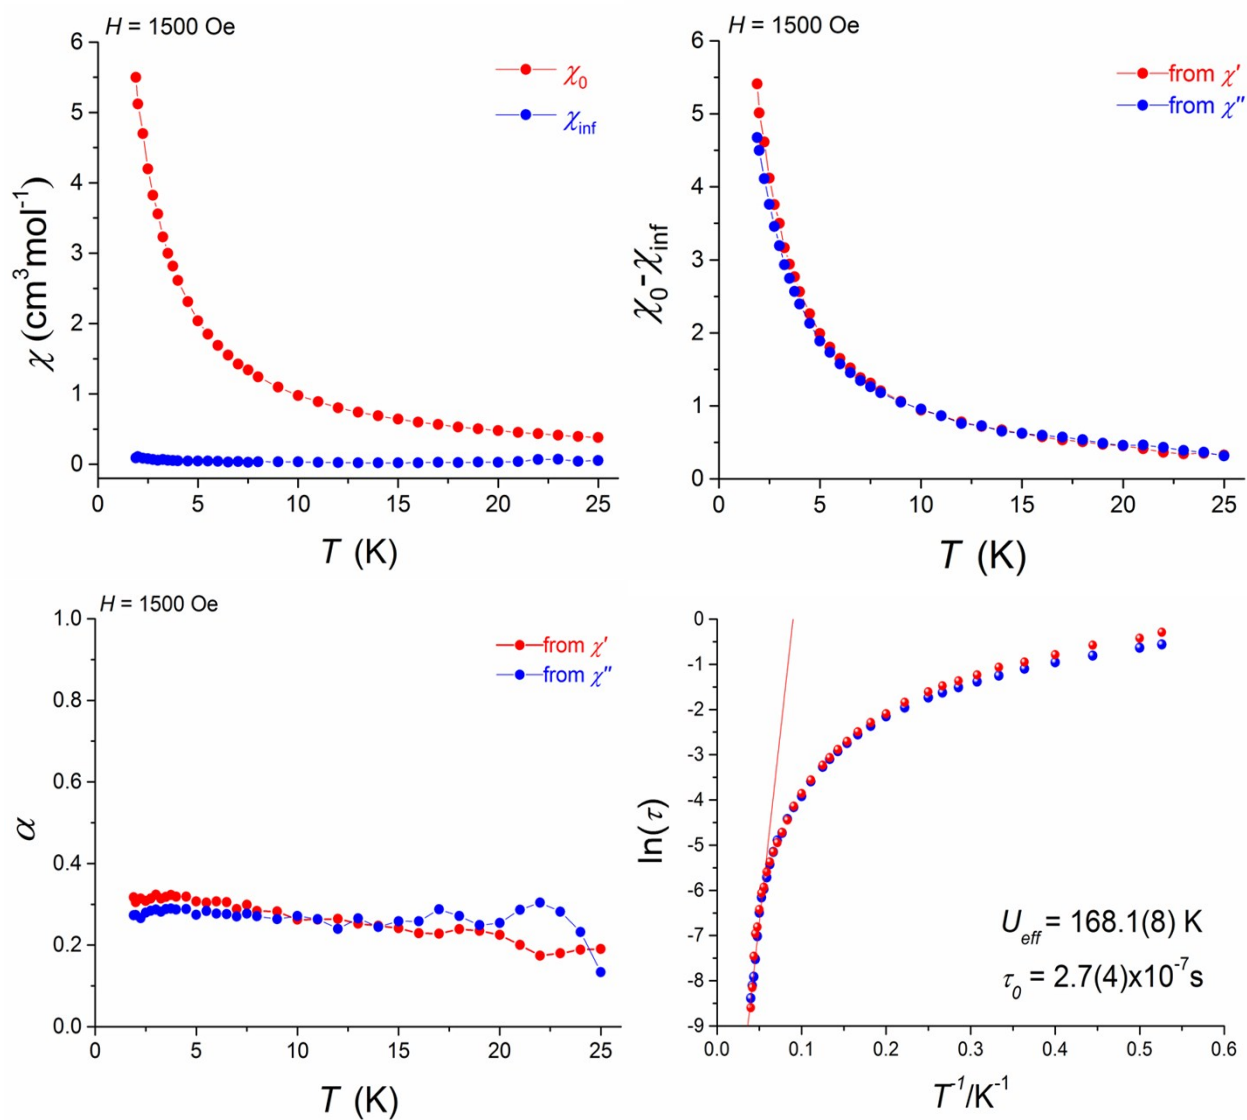

**Fig. S16.** Data obtained from generalized Debye fits of  $\chi'$  and  $\chi''$  frequency dependent ac data under 1500 Oe applied dc field for **3**. Temperature dependence of  $\chi_0$  and  $\chi_{\text{inf}}$  (top left),  $\chi_0 - \chi_{\text{inf}}$  (top right), and  $\alpha$  (bottom left). Relaxation times of the magnetization  $\ln(\tau)$  vs.  $T^{-1}$  for **3** (Arrhenius plot using  $\chi'$  (red) and  $\chi''$  (blue) ac data) under 1500 Oe applied dc field (bottom right). The solid red line corresponds to the fit of the data.

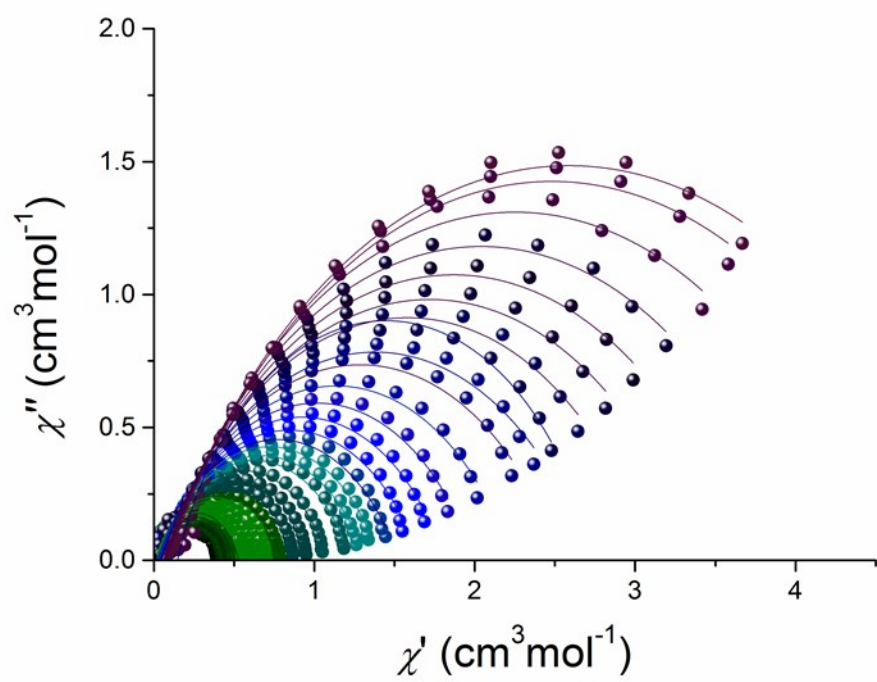

**Fig. S17** Cole-Cole plot for ac susceptibility data of **3** under 1500 Oe applied dc field. Solid lines are the best fit to the generalized Debye model.

**Table S3.** Fitting values from Cole-Cole plot for **3** under 1500 Oe applied dc field.

| $T$ (K) | $\tau$ (s) | $\alpha$ | $X_S$   | $X_T$   |
|---------|------------|----------|---------|---------|
| 24      | 0.00022336 | 0.17021  | 0.08628 | 0.37058 |
| 23      | 0.00037396 | 0.34579  | 0.07977 | 0.35778 |
| 22      | 0.00063948 | 0.3529   | 0.0771  | 0.37389 |
| 21      | 0.00078168 | 0.28857  | 0.07062 | 0.40055 |
| 20      | 0.00098928 | 0.39176  | 0.08531 | 0.40494 |
| 19      | 0.00157741 | 0.32779  | 0.08585 | 0.43837 |
| 18      | 0.00186997 | 0.29986  | 0.07987 | 0.46512 |
| 17      | 0.00241734 | 0.35525  | 0.09251 | 0.48363 |
| 16      | 0.00312527 | 0.33213  | 0.08962 | 0.51696 |
| 15      | 0.00376304 | 0.35591  | 0.10122 | 0.546   |
| 14      | 0.00474089 | 0.33571  | 0.11171 | 0.59324 |
| 13      | 0.00575977 | 0.35716  | 0.11935 | 0.62946 |
| 12      | 0.00751069 | 0.35845  | 0.1376  | 0.68235 |
| 11      | 0.00987896 | 0.37843  | 0.15329 | 0.74922 |
| 10      | 0.01361329 | 0.35164  | 0.16512 | 0.83247 |
| 9       | 0.01764974 | 0.37394  | 0.19379 | 0.91831 |
| 8       | 0.02338924 | 0.40188  | 0.22747 | 1.02594 |
| 7.5     | 0.02563866 | 0.44431  | 0.25931 | 1.07915 |
| 7       | 0.03251272 | 0.41006  | 0.26672 | 1.17136 |
| 6.5     | 0.03692582 | 0.44039  | 0.29955 | 1.24709 |
| 6       | 0.04536374 | 0.44522  | 0.33533 | 1.35397 |
| 5.5     | 0.05642189 | 0.43744  | 0.36244 | 1.48751 |
| 5       | 0.06895749 | 0.43795  | 0.40057 | 1.63621 |
| 4.5     | 0.08691612 | 0.45395  | 0.45946 | 1.81694 |
| 4       | 0.10643058 | 0.47211  | 0.53551 | 2.03925 |
| 3.75    | 0.120198   | 0.48412  | 0.58727 | 2.17402 |
| 3.5     | 0.18466038 | 0.29301  | 0.46611 | 2.42944 |
| 3.25    | 0.16490003 | 0.45149  | 0.6363  | 2.52887 |
| 3       | 0.19010407 | 0.47832  | 0.72092 | 2.7187  |
| 2.75    | 0.22116657 | 0.46288  | 0.76197 | 2.97253 |
| 2.5     | 0.27003114 | 0.4531   | 0.8173  | 3.26272 |
| 2.25    | 0.35289635 | 0.44494  | 0.88824 | 3.61437 |
| 2       | 0.41219035 | 0.45706  | 1.00871 | 3.95336 |
| 1.9     | 0.48678291 | 0.4661   | 1.06446 | 4.11315 |
